# Supplementary material for: New ICT-Based Ratiometric Two-Photon near Infrared Probe for Imaging Tyrosinase in Living Cells, Tissues, and Whole Organisms
Source: MDPI journal article supplement (doi:10.3390/chemosensors11020145), 2023-02-16
Supplement: s1 [file s1]

## Supporting Information

# New ICT-Based Ratiometric Two-Photon Near Infrared Probe for Imaging Tyrosinase in Living Cells, Tissues, and Whole Organisms

Javier Valverde-Pozo<sup>1</sup>, Jose Manuel Paredes<sup>1,\*</sup>, M. Eugenia García-Rubiño<sup>1</sup>, Thomas J. Widmann<sup>2</sup>, Carmen Griñan-Lison<sup>2, 3, 4</sup>, Silvia Lobon-Moles<sup>1</sup>, Juan Antonio Marchal<sup>3, 5, 6</sup>, Jose Maria Alvarez-Pez<sup>1</sup> and Eva Maria Talavera<sup>1,\*</sup>

<sup>1</sup> Nanoscopy-UGR Laboratory, Department of Physical Chemistry, Faculty of Pharmacy, Unidad de Excelencia en Química Aplicada a Biomedicina y Medioambiente (UEQ), University of Granada, C. U. Cartuja, 18071 Granada, Spain.

<sup>2</sup> GENYO, Centre for Genomics and Oncological Research, Pfizer/University of Granada/Andalusian Regional Government, 18016 Granada, Spain.

<sup>3</sup> Instituto de Investigación Biosanitaria (ibs.GRANADA), 18012 Granada, Spain.

<sup>4</sup> UGC de Oncología Médica, Complejo Hospitalario de Jaen, 23007 Jaen, Spain.

<sup>5</sup> Centre for Biomedical Research (CIBM), Biopathology and Regenerative Medicine Institute (IBIMER), University of Granada, 18100 Granada, Spain.

<sup>6</sup> Department of Human Anatomy and Embryology, Faculty of Medicine, University of Granada, 18016 Granada, Spain.

\* Correspondence: etalaver@ugr.es; Tel.: +34 958243828 (optional; include country code; if there are multiple corresponding authors, add author initials); jmparedes@ugr.es; Tel.: +34 958243829

## Index

|                                                                                                                                                                               |    |
|-------------------------------------------------------------------------------------------------------------------------------------------------------------------------------|----|
| Figure S1. Representative ICT-based two photon excitable molecules.                                                                                                           | 3  |
| Synthesis of compound DCM-HBU.                                                                                                                                                | 4  |
| Scheme S1. Synthesis of compound DCM-NH <sub>2</sub>                                                                                                                          | 4  |
| Mass and NMR spectra.                                                                                                                                                         | 5  |
| IR spectrum                                                                                                                                                                   | 6  |
| Figure S2. Absorption spectra of DCM-HBU at different concentrations.                                                                                                         | 7  |
| Figure S3. Molar absorptivity coefficient calculation.                                                                                                                        | 7  |
| Figure S4. Emission spectra of DCM-HBU at different concentrations.                                                                                                           | 8  |
| Figure S5. Absorption spectrum of DCM-NH <sub>2</sub>                                                                                                                         | 8  |
| Figure S6. Emission spectra of DCM-NH <sub>2</sub>                                                                                                                            | 9  |
| Quantum yield calculation.                                                                                                                                                    | 10 |
| Table S1. Fluorescence quantum yields, absorptivity coefficients and Stokes shift of DCM-NH <sub>2</sub>                                                                      | 10 |
| Figure S7. Fluorescence decays of DCM-NH <sub>2</sub> and DCM-HBU.                                                                                                            | 11 |
| Figure S8. pH dependence of DCM-NH <sub>2</sub>                                                                                                                               | 12 |
| Figure S9. Photobleaching assay                                                                                                                                               | 12 |
| Figure S10. Evolution of the emission spectra of DCM-HBU with TYR.                                                                                                            | 13 |
| Figure S11. Influence of pH and temperature on enzyme activity.                                                                                                               | 13 |
| Figure S12. IR spectra.                                                                                                                                                       | 14 |
| Figure S13. Two photon excitation spectra                                                                                                                                     | 15 |
| Figure S14. Logarithmic plot of the power dependence of the relative two photon intensity                                                                                     | 15 |
| Figure S15. Representative images of the green and red intensity channels and R:G ratio images of A-375 and MEL1 cells after adding DCM-HBU.                                  | 16 |
| Figure S16. Increase in the value of the ratio versus time of the images of MEL1 and A-375 cells.                                                                             | 16 |
| Figure S17. Representative images of the green and red intensity channels of A-375 tumours after adding DCM-HBU using two-photon microscopy.                                  | 17 |
| Figure S18. 3D red and green intensity images of A-375 tumours after adding DCM-HBU using two-photon microscopy.                                                              | 17 |
| Figure S19. Top and bottom planes of 3D ratiometric images of A-375 tumours.                                                                                                  | 18 |
| Figure S20. Images of living zebrafish embryos and larvae incubated with DMSO.                                                                                                | 18 |
| Video S1. Fluorescence microscopy R:G ratio maps of live A-375 cell line after adding DCM-HBU and representation of the R:G ratio values over time, by two-photon excitation. | 18 |
| Video S2. 3D ratiometric images of A-375 tumours.                                                                                                                             | 18 |

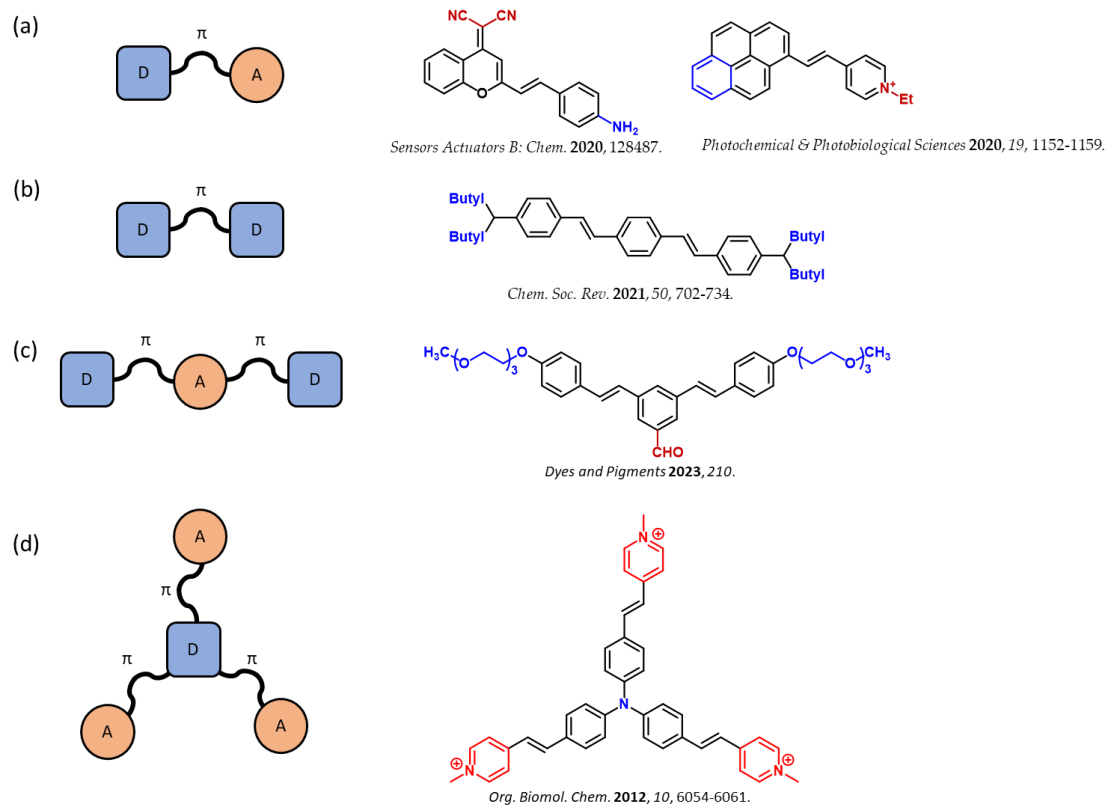

**Figure S1.** Representative ICT-based two photon excitable molecules of (a) D- $\pi$ -A dipoles, (b) D- $\pi$ -D and (c) D- $\pi$ -A- $\pi$ -D quadrupoles and (d) two-dimensional octupoles with some structures reported.

### Synthesis of DCM-HBU

To a solution of compound DCM-NH<sub>2</sub> (80 mg, 0.257 mmol, 1 eq) in anhydrous dichloromethane (12.82 mL) under a N<sub>2</sub> atmosphere, triphosgene (153 mg, 0.513 mmol, 2 eq) was added. The mixture was then cooled to 0°C to add DIPEA (88.9 µL, 0.513 mmol, 2 eq) and was stirred for 3 h; during this time, the temperature was carefully maintained within the range of 0-5 °C by use of an ice bath. Then, 4-hydroxybenzylamine (127 mg, 1.03 mmol, 4 eq) was added and the reaction was kept at room temperature for 24 h, under a N<sub>2</sub> atmosphere. Then, the solvent was removed under low pressure, and the residue was submitted to flash chromatography in CH<sub>2</sub>Cl<sub>2</sub>:CH<sub>3</sub>OH mixtures to produce of DCM-HBU as a pale-yellow solid (6 mg), yield 5 %, mp 172-173 °C <sup>1</sup>H NMR (500 MHz, DMSO) δ 9.88 (s, 1H), 9.29 (s, 1H), 9.16 (s, 1H), 8.74 (dd, *J* = 8.4 Hz, 1H), 7.93 (ddd, *J* = 8.5, 7.2, 1.4 Hz, 1H), 7.82 (dd, *J* = 8.4, 1.1 Hz, 1H), 7.72 (dd, *J* = 15.5, 12.4 Hz, 3H), 7.62 (ddd, *J* = 8.4, 7.2, 1.3 Hz, 1H), 7.57 (d, *J* = 8.7 Hz, 2H), 7.33 (d, *J* = 15.9 Hz, 1H), 7.10 (d, *J* = 8.9 Hz, 3H), 7.00 (s, 1H), 6.71 (d, *J* = 8.8 Hz, 3H). TOF MS ES <sup>-</sup>, calculated for C<sub>28</sub>H<sub>20</sub>N<sub>4</sub>O<sub>3</sub>Cl: 495.1224 (M+Cl<sup>-</sup>); found: 495.1241.

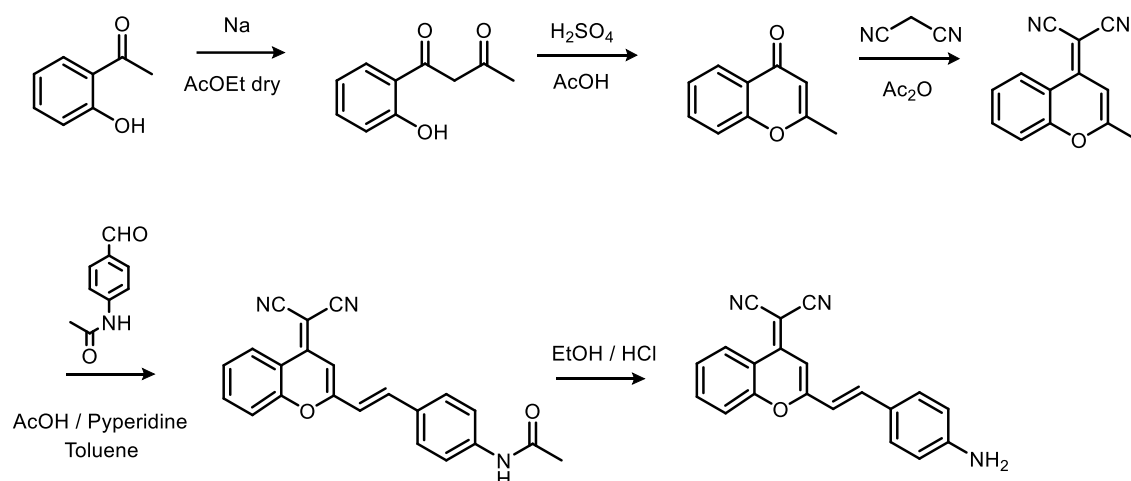

**Scheme S1.** Synthesis of compound DCM-NH<sub>2</sub>.

## Mass spectrum of compound DCM-HBU

### Elemental Composition Report

Page 1

#### Single Mass Analysis

Tolerance = 10.0 PPM / DBE: min = -1.5, max = 50.0

Element prediction: Off

Number of isotope peaks used for i-FIT = 3

Monoisotopic Mass, Even Electron Ions

418 formula(e) evaluated with 5 results within limits (up to 50 closest results for each mass)

Elements Used:

C: 0-28 H: 0-1000 N: 0-4 O: 0-7 Na: 0-1 Cl: 0-1

SilviaDneg 11 (0.250) AM (Top, 1, Ht, 5000.0, 0.00, 1.00)

1: TOF MS ES-

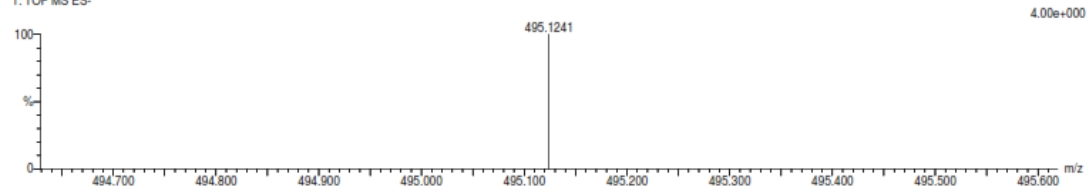

|          |            |      |      |      |       |              |         |     |             |
|----------|------------|------|------|------|-------|--------------|---------|-----|-------------|
| Minimum: |            |      |      |      |       |              |         |     |             |
| Maximum: |            | 5.0  | 10.0 | -1.5 |       |              |         |     |             |
|          |            |      |      | 50.0 |       |              |         |     |             |
| Mass     | Calc. Mass | mDa  | PPM  | DBE  | i-FIT | i-FIT (Norm) | Formula |     |             |
| 495.1241 | 495.1224   | 1.7  | 3.4  | 20.5 | 12.6  | 1.5          | C28     | H20 | N4 O3 Cl    |
|          | 495.1211   | 3.0  | 6.1  | 15.5 | 12.6  | 1.5          | C27     | H24 | O7 Cl       |
|          | 495.1281   | -4.0 | -8.1 | 17.5 | 12.8  | 1.7          | C25     | H20 | N4 O6 Na    |
|          | 495.1200   | 4.1  | 8.3  | 17.5 | 12.6  | 1.5          | C26     | H21 | N4 O3 Na Cl |
|          | 495.1192   | 4.9  | 9.9  | 20.5 | 12.8  | 1.8          | C28     | H19 | N2 O7       |

## <sup>1</sup>H-NMR spectrum of compound DCM-HBU

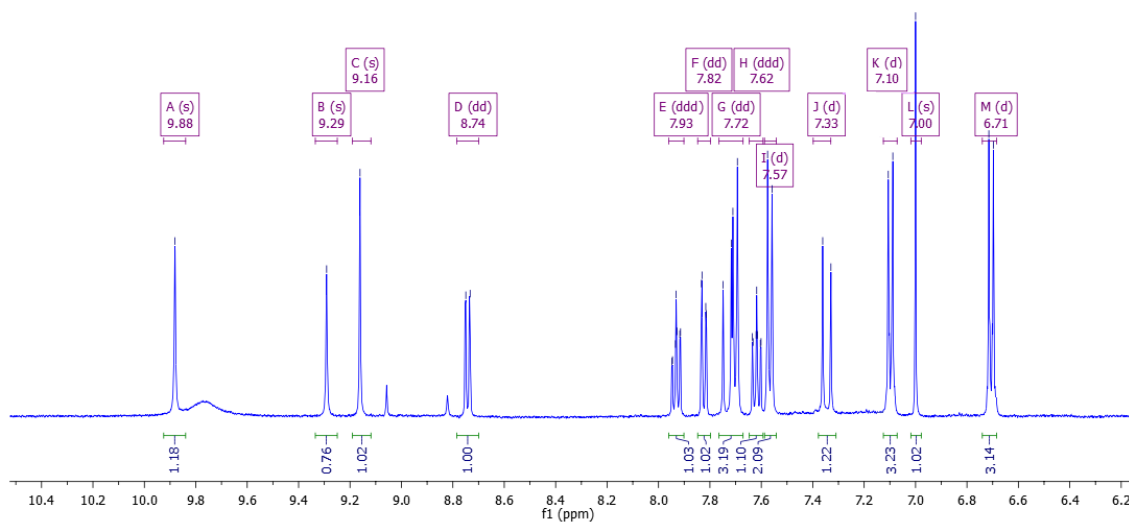

### IR spectrum of compound DCM-HBU

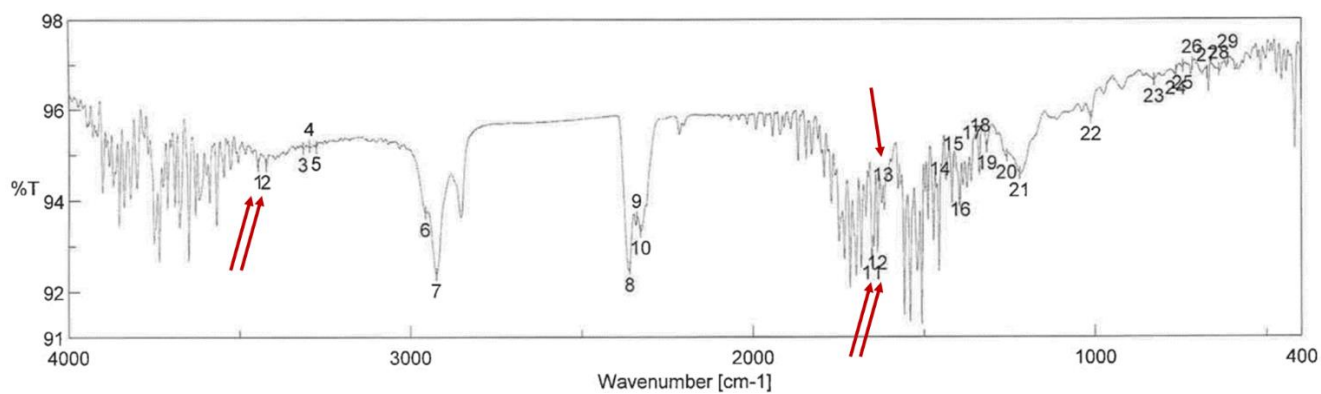

IR spectrum of DCM-HBU shows the bands from amide groups indicated by the arrows:

- 1 and 2, stretching N-H
- 11 and 12, stretching C=O
- 13, bending N-H

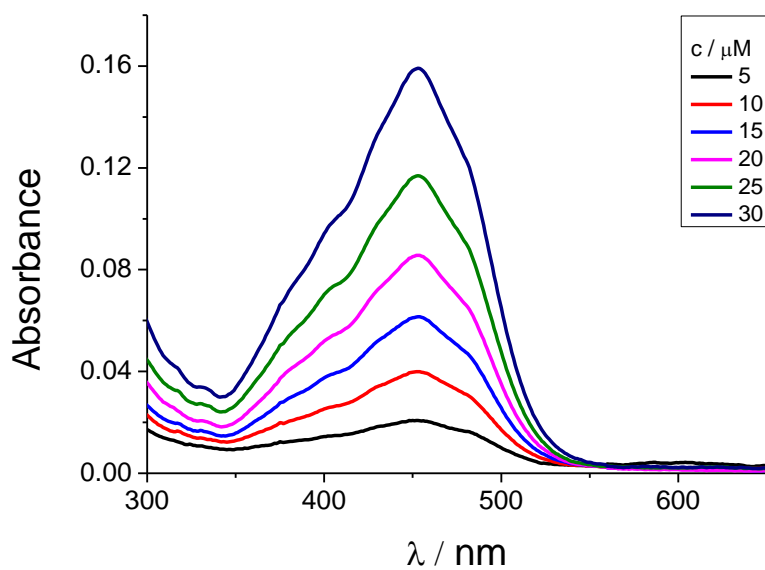

**Figure S2.** Absorption spectra of DCM-HBU at different concentrations in PBS/DMSO (7/3, v/v).

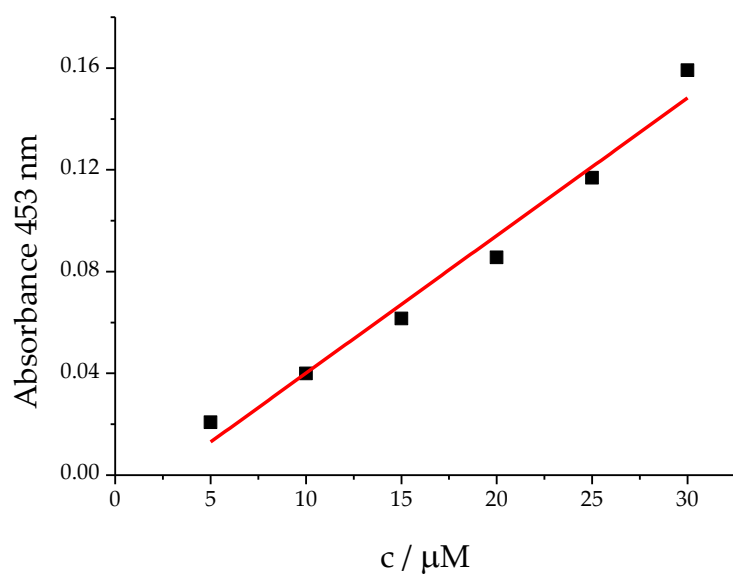

**Figure S3.** Determination of the molar absorptivity coefficient of the compound DCM-HBU in PBS /DMSO (7/3, v/v) at  $\lambda = 453$  nm. Fit equation:  $y = -0.01402 + 5.409x$ ,  $R^2 = 0.971$ .

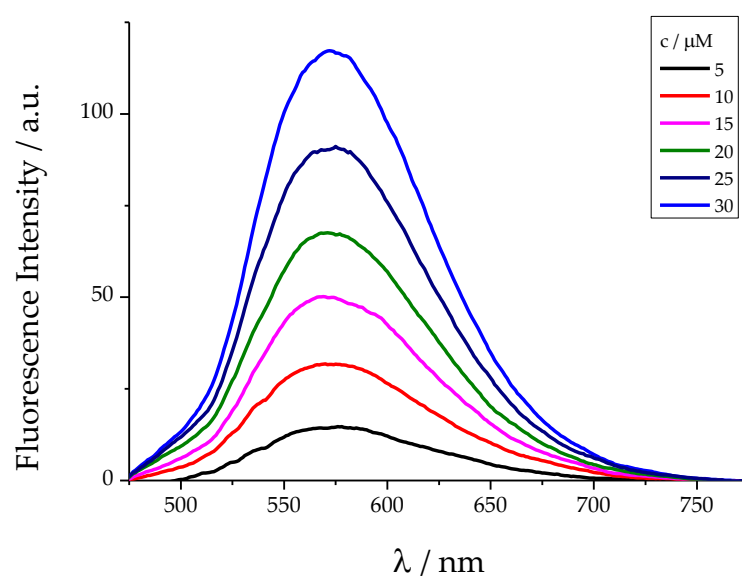

**Figure S4.** Emission spectra of DCM-HBU at different concentrations in PBS/DMSO (7/3, v/v) by excitation at 453 nm.

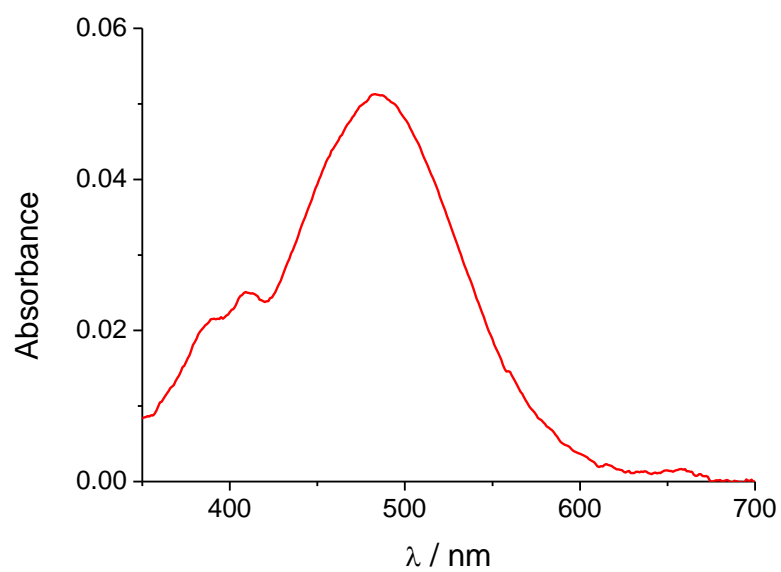

**Figure S5.** Absorption spectrum of DCM-NH<sub>2</sub> in PBS/DMSO (7/3, v/v).



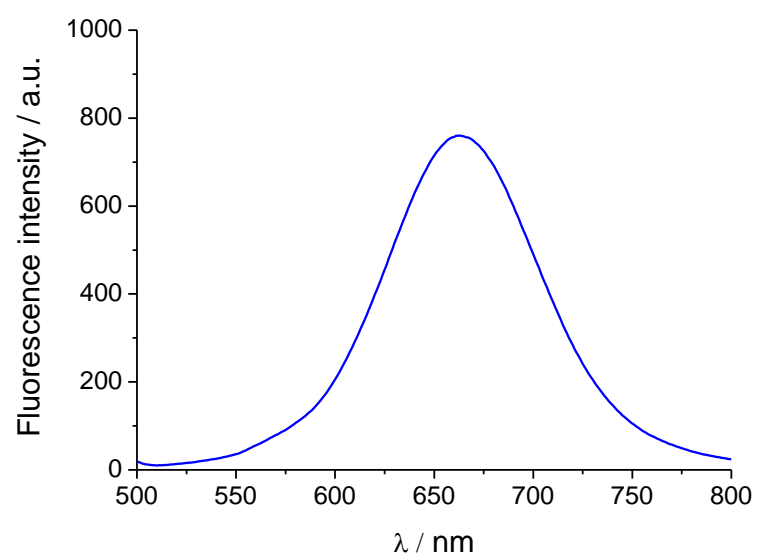

**Figure S6.** Emission spectrum of DCM-NH<sub>2</sub> in PBS/DMSO (7/3, v/v).

### Quantum yield calculation

The relative fluorescence quantum yield data were obtained by integrating the areas under the fluorescence curves using the expression:

$$\Phi = \Phi_R \cdot \frac{I}{I_R} \cdot \frac{OD_R}{OD} \cdot \frac{n^2}{n_R^2}$$

where  $\Phi$  and  $\Phi_R$  indicate the fluorescence quantum yields of the sample and reference, respectively;  $I$  and  $I_R$  the integrated fluorescence spectra of the sample and reference, respectively;  $OD$  and  $OD_R$  are the optical density at the excitation wavelength of the sample and reference, respectively; and  $n$  and  $n_R$  are the refractive indexes of the solvents where the sample and reference are dissolved, respectively. As references, we have used Fluorescein in NaOH 0.1M ( $\Phi = 0.91$ ) for DCM-HBU, and Rhodamine 101 in MeOH ( $\Phi = 1$ ) for DCM-NH<sub>2</sub>.

The procedure followed to calculate the QY was, firstly, prepare the samples in the solvents in a concentration with an absorption less than 0.1. Later, we selected an excitation wavelength that allows to register the complete emission spectrum. The integrated areas under the fluorescence spectra were calculated using Origin 8.5 software. The spectra used to calculate the QY are represented in the Figure 1a and 1b, S2, S4, S5 and S6.

**Table S1.** Fluorescence quantum yields, absorptivity coefficients and Stokes shift of DCM-NH<sub>2</sub>

| Solvent              | $\Phi$ | $\lambda_{abs}^{max} / \text{nm}$ | $\lambda_{em}^{max} / \text{nm}$ | Stokes shift / nm | $\epsilon^* / \text{M}^{-1} \text{cm}^{-1}$ |
|----------------------|--------|-----------------------------------|----------------------------------|-------------------|---------------------------------------------|
| Acetone              | 7.2 %  | 486                               | 639                              | 153               | 54 380                                      |
| Acetonitrile         | 10.7 % | 478                               | 640                              | 162               | 47 660                                      |
| Chlorobenzene        | 5.9 %  | 489                               | 630                              | 141               | 45 080                                      |
| DMSO                 | 14.6 % | 520                               | 666                              | 146               | 45 510                                      |
| Toluene              | 2.8 %  | 490                               | 616                              | 126               | 42 140                                      |
| Water                | 0.4%   | 469                               | 657                              | 188               | 31 050                                      |
| DMSO/water, 7/3, v/v | 0.7 %  | 480                               | 662                              | 182               | 37 685                                      |

\* at maxima absorption wavelength

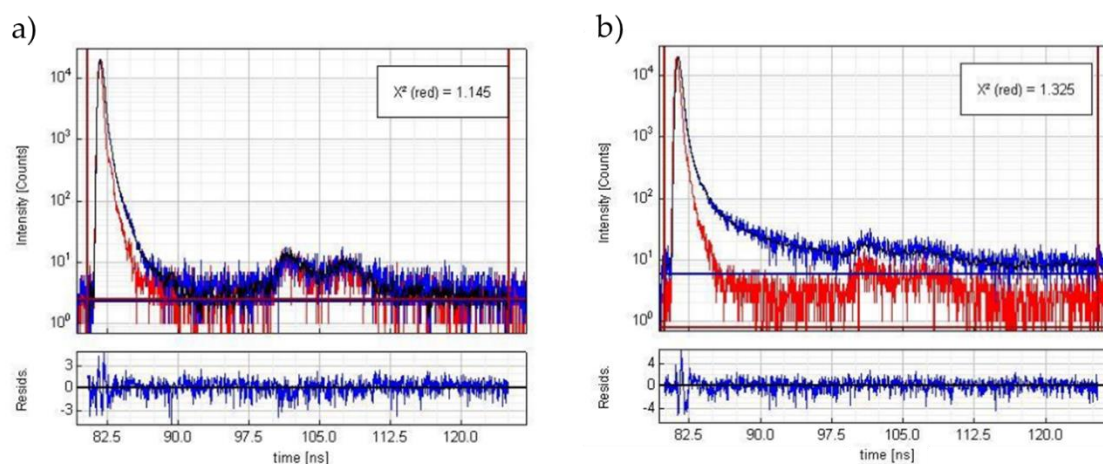

**Figure S7.** a) Fluorescence decay of DCM-NH<sub>2</sub> at  $\lambda_{\text{ex}} = 485$  nm and  $\lambda_{\text{em}} = 664$  nm. b) Fluorescence decay of DCM-HBU at  $\lambda_{\text{ex}} = 440$  nm y  $\lambda_{\text{em}} = 570$  nm.

We used the TCSPC method to register the fluorescence decay by a FluoTime 200 fluorometer (PicoQuant, Inc.). Excitation was achieved by a 485 nm or 440 nm laser-pulsed (PicoQuant, Inc.). The pulse repetition rate was 40 MHz.

Fluorescence traces were obtained in 1320 channels. The channel resolution was 36 ps. Histograms of the instrument response functions (using LUDOX scatterer) and sample decays were recorded until they reached 20 000 counts in the peak channel. Fluorescence decays were recorded at three emission wavelengths, 659, 664 and 669 nm for the sample DCM-NH<sub>2</sub> (7/3 PBS/DMSO (v/v)) and 565, 570 y 575 nm for the DCM-HBU(7/3 PBS/DMSO (v/v)).

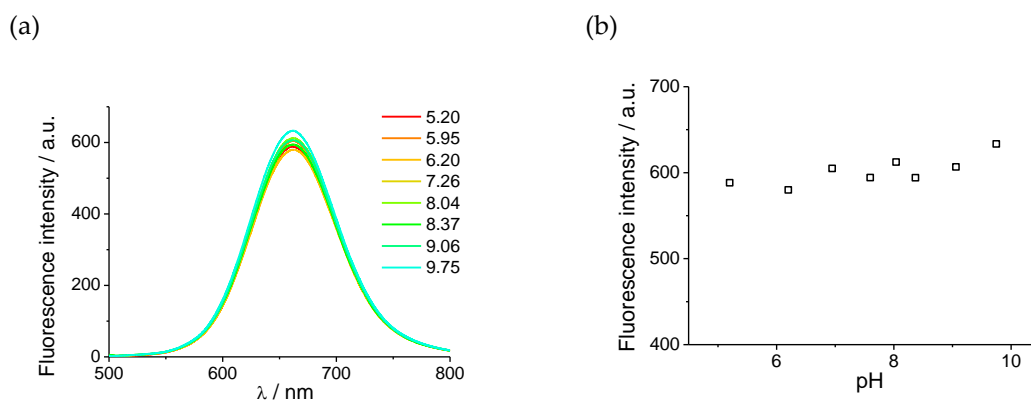

**Figure S8.** (a) Emission spectra of DCM-NH<sub>2</sub> in in PBS/DMSO (7/3, v/v) at different pH values. (b) Representation of the maximum fluorescence intensity in function of pH.

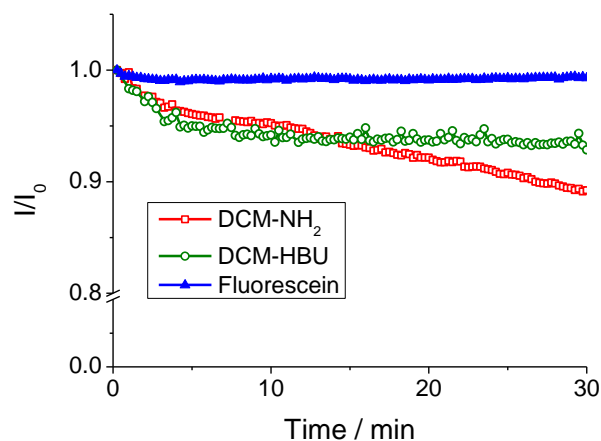

**Figure S9.** Normalized steady-state fluorescence intensity at its maximum value of fluorescein, DCM-HBU and DCM-NH<sub>2</sub> continuously irradiated with a Xe lamp.

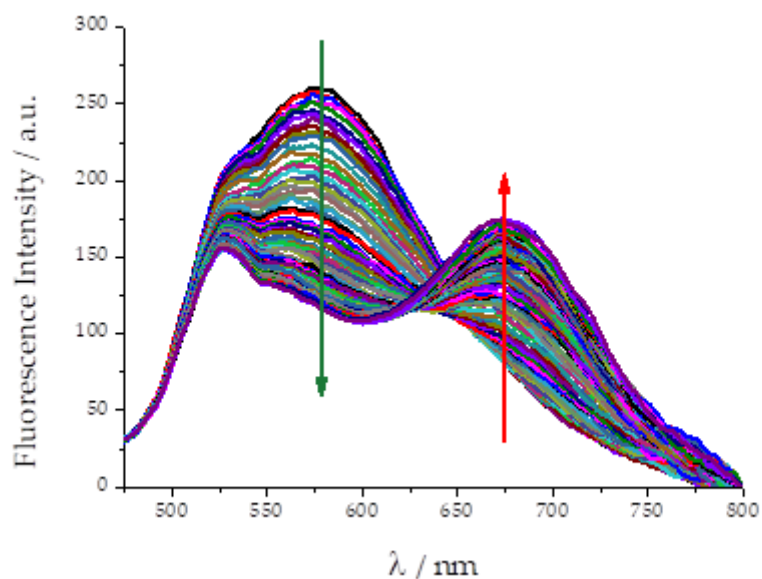

**Figure S10.** Evolution of the emission spectra of DCM-HBU (25  $\mu\text{M}$ ) with TYR (0.13  $\text{mg mL}^{-1}$ ) observed every 1 min for 2 h by excitation at 450 nm at 37  $^{\circ}\text{C}$ .

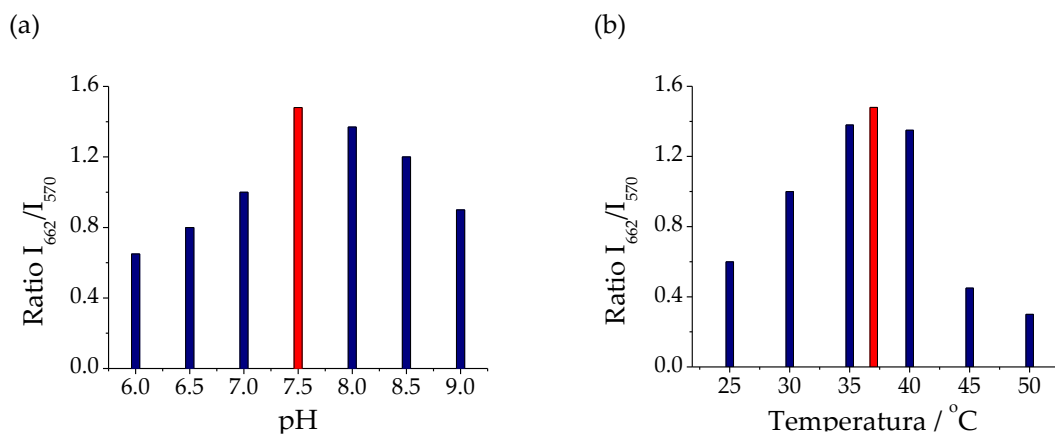

**Figure S11.** (a) Ratiometric measurements of fluorescence signals of  $I_{662}/I_{570}$  of DCM-HBU (25  $\mu\text{M}$ ) with DPP IV (0.13  $\text{mg mL}^{-1}$ ) after 2 h of incubation at 37  $^{\circ}\text{C}$  and different pHs by excitation at 450 nm. (b) Ratiometric measurements of fluorescence signals of  $I_{662}/I_{570}$  of DCM-HBU (25  $\mu\text{M}$ ) with DPP IV (0.13  $\text{mg mL}^{-1}$ ) after 2 h of incubation at different temperatures and pH 7.5  $^{\circ}\text{C}$  by excitation at 450 nm.

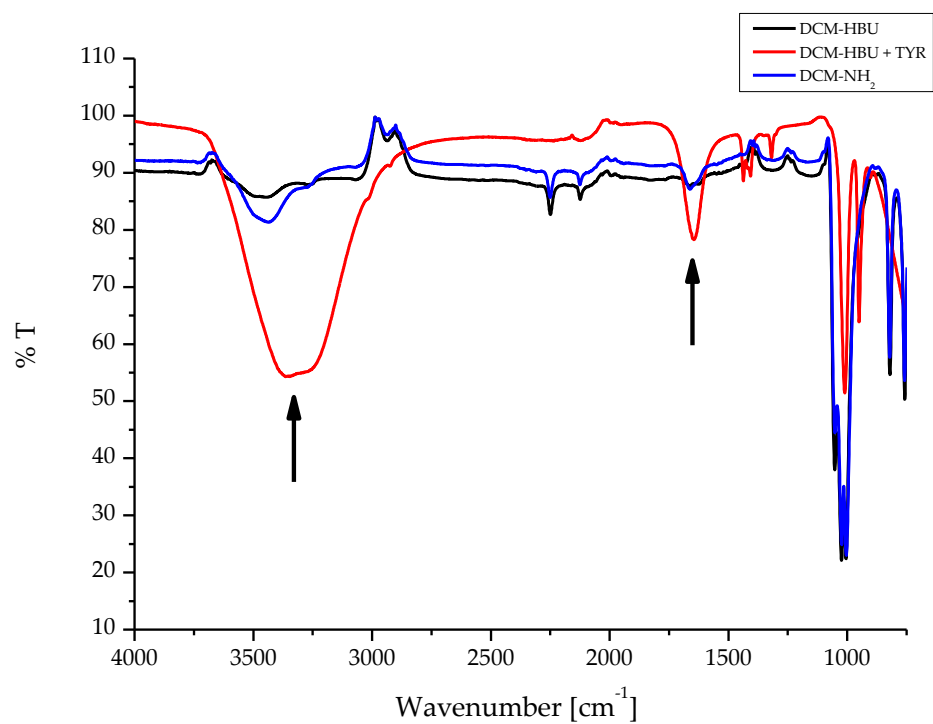

**Figure S12.** IR spectra of DCM-NH<sub>2</sub> (in DMSO), DCM-HBU (in DMSO) and DCM-HBU with TYR (in PBS/DMSO 7,3 v/v) after 2 h of reaction.

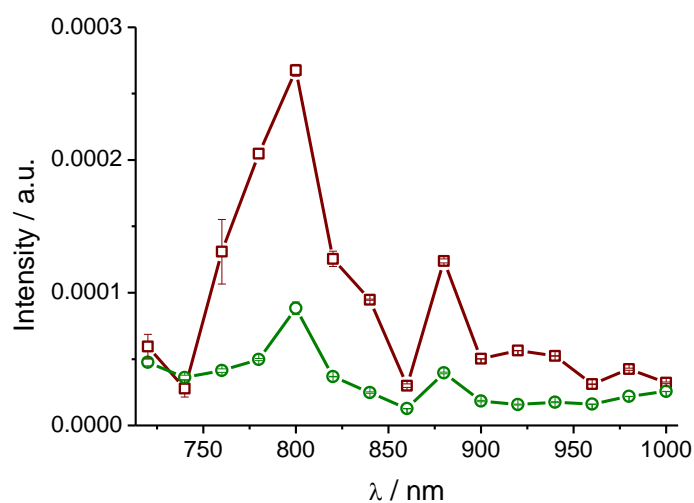

**Figure S13.** Two-photon excitation spectra of DCM-NH<sub>2</sub> (square in brown) and DCM-HBU (circles in green) measured in PBS/DMSO 7/3 v/v. Emission collected at 650–720 nm and 502–538 nm, and excitation ranging from 720 to 1000 nm, measured every 20 nm. The intensities were calculated by normalization to the power of the excitation source measured on the excitation pathway. Bars represent the standard error from three replicates.

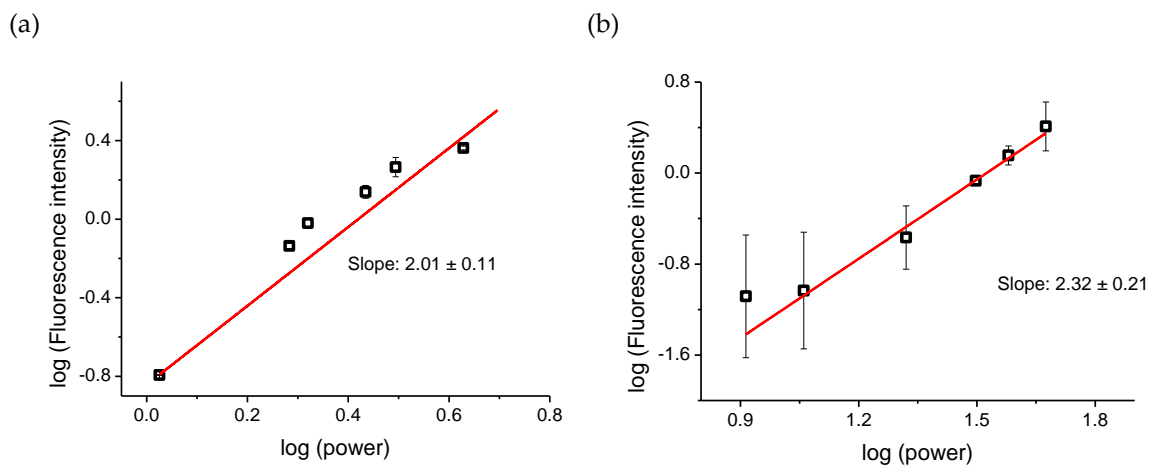

**Figure S14.** Logarithmic plot of the power dependence of the relative two-photon induced fluorescence intensity of (a) DCM-NH<sub>2</sub> and (b) DCM-HBU. Error bars represent SE.

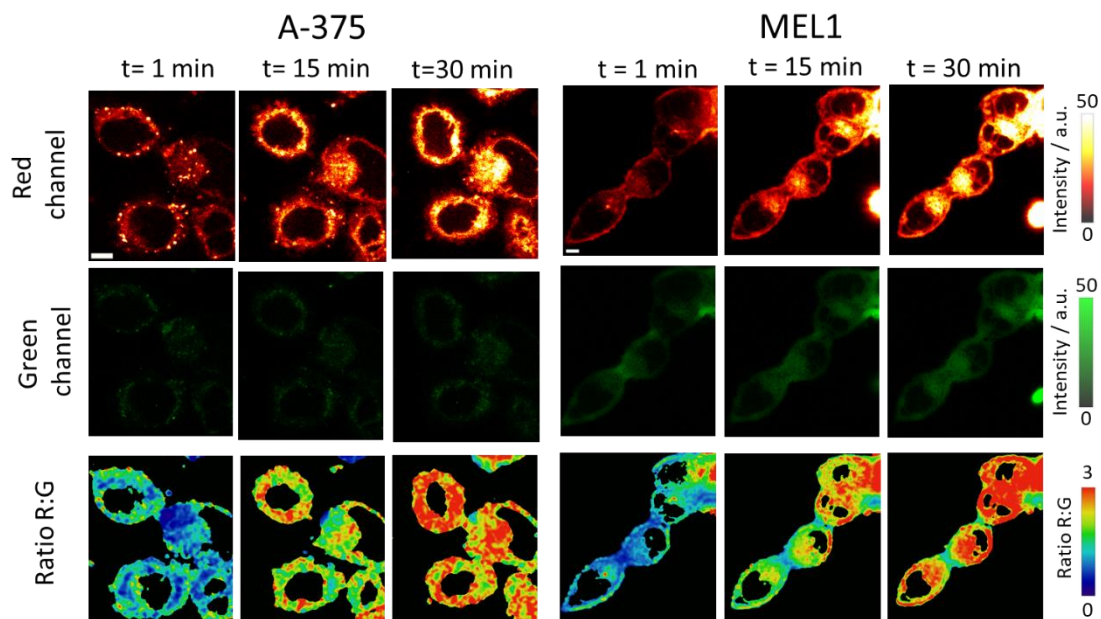

**Figure S15.** Representative images of the red ( $\lambda_{em} = 650\text{-}720\text{ nm}$ ) and green ( $\lambda_{em} = 502\text{-}538\text{ nm}$ ) intensity channels and the ratio R:G images of A-375 and MEL1 cells after adding DCM-HBU ( $5\text{ }\mu\text{M}$ ) over time by excitation at  $453\text{ nm}$ . Scale bars are  $5\text{ }\mu\text{m}$ .

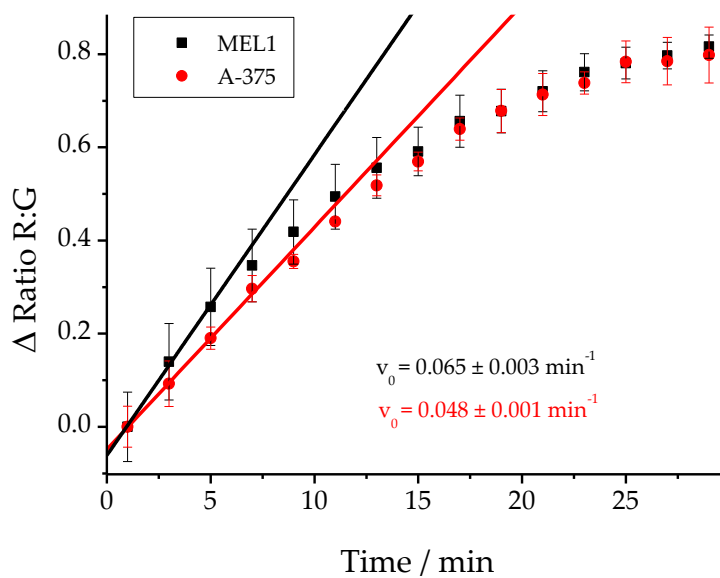

**Figure S16.** Increase in the value of the ratio versus time of the images of MEL1 and A-375 cells. Error bars represent SE.



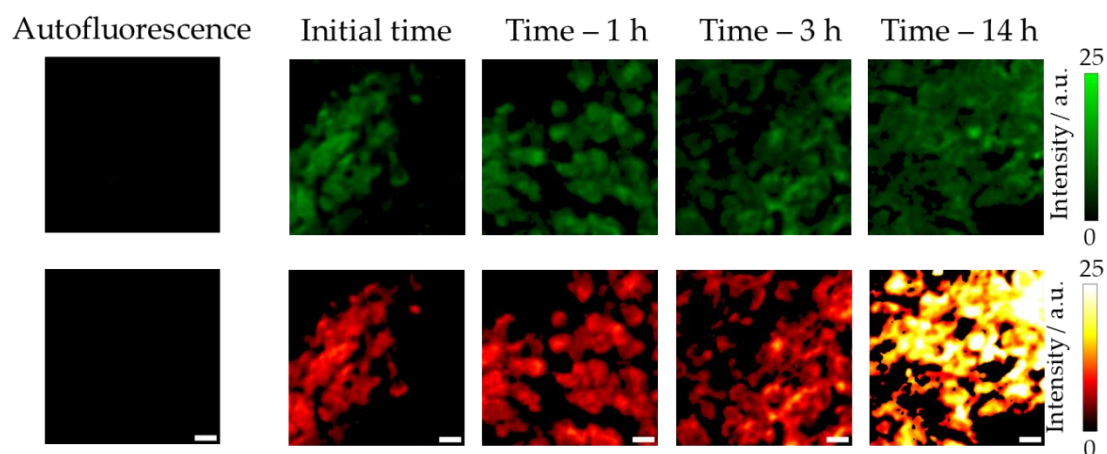

**Figure S17.** Representative images of the intensity green ( $\lambda_{em} = 502\text{-}538\text{ nm}$ ) and red ( $\lambda_{em} = 650\text{-}720\text{ nm}$ ) channels (first and second lines, respectively) of A-375 tumours after adding DCM-HBU ( $5\text{ }\mu\text{M}$ ) using two-photon microscopy with excitation at  $800\text{ nm}$ . Scale bars are  $10\text{ }\mu\text{m}$ .

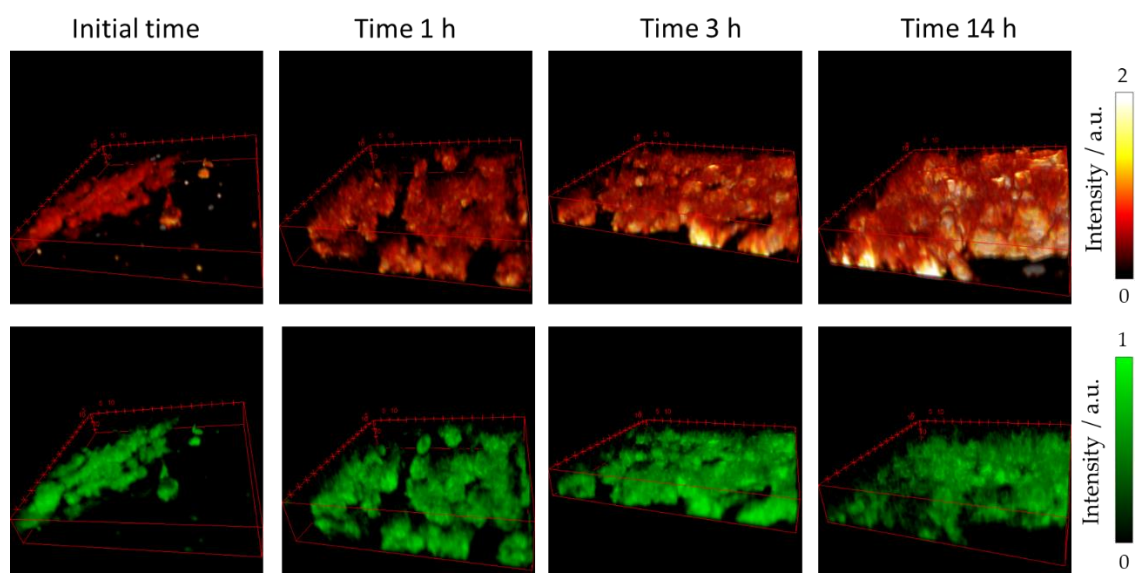

**Figure S18.** 3D red (first line) and green (second line) intensity images of A-375 tumours using two-photon microscopy with excitation at  $800\text{ nm}$

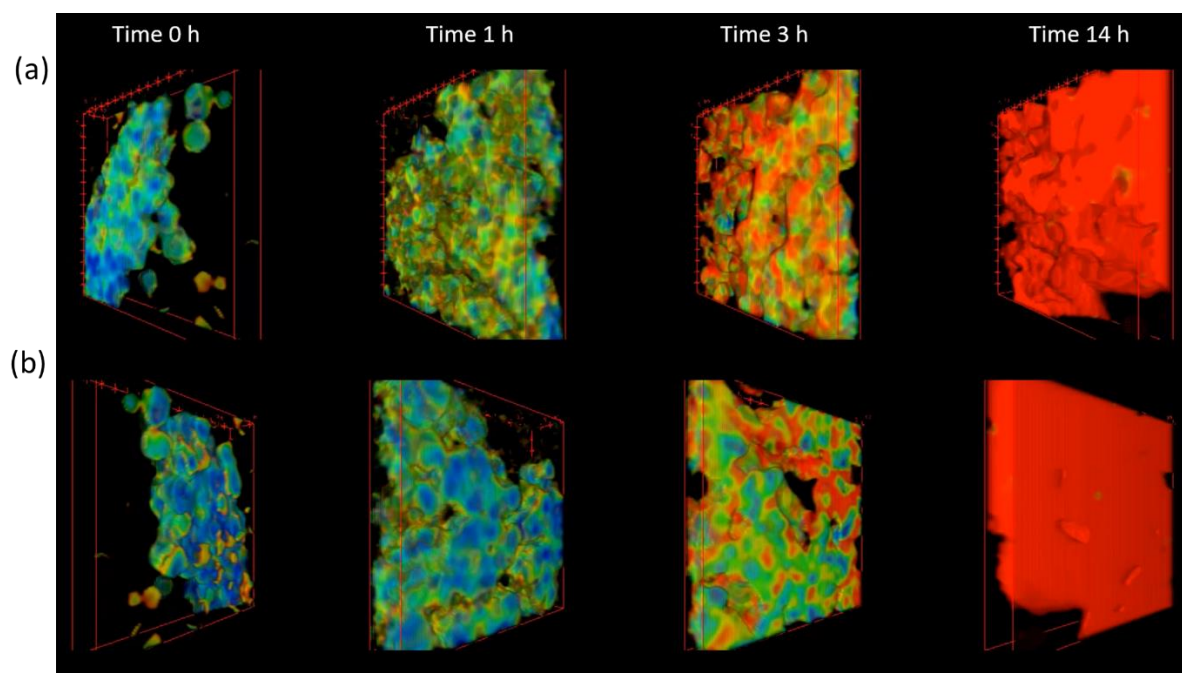

**Figure S19.** Top (a) and bottom (b) plane of 3D ratiometric images of A-375 tumours.

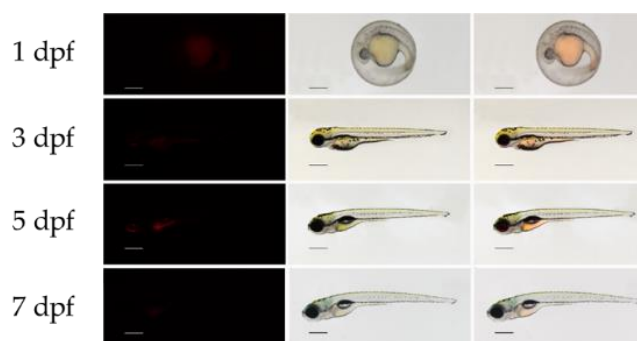

**Figure S20.** Living zebrafish embryos and larvae incubated with 10  $\mu$ M DMSO for 3 h at different days post fertilization (dpf); red fluorescent (left), brightfield (centre), and merge (right) images are taken with a stereo microscope ( $\lambda_{\text{exc}} = 458 \text{ nm}$ ;  $\lambda_{\text{em}} = 680 \text{ nm}$ ). Scale bars: 1 dpf: 250  $\mu$ m, 3-7 dpf: 500  $\mu$ m.

**Video S1.** Fluorescence microscopy R:G ratio maps of live A-375 cell line after adding DCM-HBU and representation of the R:G ratio values over time, by two-photon excitation.

**Video S2.** 3D ratiometric images of A-375 tumours.
