# Supplementary material for: New ICT-Based Ratiometric Two-Photon near Infrared Probe for Imaging Tyrosinase in Living Cells, Tissues, and Whole Organisms
Source: MDPI journal article supplement (doi:10.3390/chemosensors11020145), 2023-02-16
Supplement: s1 [file s1]

Archive with 3 entries (3 files):
- Supplementary_Material.pdf
- Video S1.mp4
- Video S2.mp4
